# Supplementary material for: A convenient method for selective detection of 5-hydroxymethylcytosine and 5-formylcytosine sites in DNA sequences
Source: Royal Society of Chemistry journal article supplement (doi:10.1039/c3ob40447a), 2013-01-01
Supplement: c3ob40447a.pdf [file c3ob40447a.pdf]

## Supporting information

Wuxiang Mao,<sup>‡a</sup> Jianlin Hu,<sup>‡a</sup> Tingting Hong, Xiwen Xing, Sen Wang, Xi Chen, and Xiang Zhou<sup>\*ab</sup>

### Table of content

|           |                                                                                              |
|-----------|----------------------------------------------------------------------------------------------|
| Figure S1 | PAGE analysis of single strands DNA after treated with different concentration of piperidine |
| Figure S2 | PAGE analysis of single strands DNA with different time of reacting with piperidine          |
| Figure S3 | PAGE analysis of DNA fragments in the promoter regions                                       |

### Materials and methods

#### DNA preparation:

DNA was purchased from Takara Biotechnology (Dalian) containing either cytosine, 5-methylcytosine, 5-hydroymethylcytosine or formylcytosine.

#### The preparation of G-ladder:

1  $\mu$ L DNA (100 mM), 10  $\mu$ L Tris-EDTA buffer (100 mM, pH 7.8) and 89  $\mu$ L distilled water were added to the G reaction tube and 40  $\mu$ L distilled water, 20  $\mu$ L CH<sub>3</sub>COONa-CH<sub>3</sub>COOH buffer (1 M, pH 5.0), and 40  $\mu$ L ethanethiol were added to the other tube to prepare DMS stop buffer. Then added 2  $\mu$ L DMS to the G reaction tube and immediately closed the tubes and mixed. The tube was incubated at room temperature for eight minutes, followed by adding the DMS stop buffer plus 100% ethanol having been prechilled to -20°C to the G reaction tube and mixing. The mixture was freezed at -80°C for 2h, and centrifuged for 20 minutes. After the piperidine treatment, the DNA was precipitated as the step mentioned above.

#### DNA oxidations:

ssDNA oxidation: DNA was made up to 21  $\mu$ L with NaOH (50mM final concentration) at 4°C, then 4  $\mu$ L of a KRuO<sub>4</sub>(Alpha Aeser) solution (6 mM in 50 mM NaOH) was added and the reaction was held at 4°C for 1h. the reaction was purified by pore film.

dsDNA oxidation: DNA was made up to 21  $\mu$ L with NaOH (50mM final concentration), then was denatured at 37°C for 30 min. The reaction was snap cooled at 4 °C for 20 min, then 4  $\mu$ L of a KRuO<sub>4</sub>(Alpha Aeser) solution (6 mM in 50 mM NaOH) was added immediately. After the reaction at 4°C for 1 h, the DNA was purified, and then denatured in NaOH again. The reaction was snap cooled again before the second time oxidization. Finally the DNA was purified by pore film.

#### The DNA sequencing analysis by polyacrylamide gel electrophoresis:

Following the steps of piperidine cleavage and freeze drying, the DNA samples were loaded into a 20% polyacrylamide gel for electrophoresis at 20 V/cm; this electrophoresis occurred at room temperature in 1×TBE buffer. The gel was then analysed using the Pharos FX Molecular Imager (Bio-Rad, USA).

#### PAGE analysis

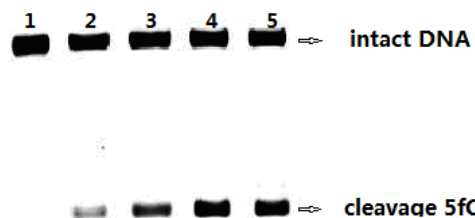

**Figure S1.** Polyacrylamide gel electrophoresis analysis of DNA **1** (X, Z=C, Y=5fC). Treatment of the DNA **1** (20pmol) with piperidine at 90 °C for 30 mins. The volume fractions of piperidine in lanes 1-5 were 0%, 5%, 10%, 15% and 20%, respectively.

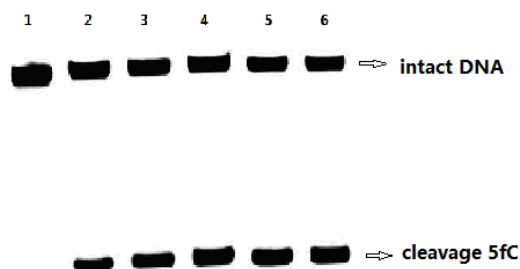

**Figure S2.** Polyacrylamide gel electrophoresis analysis of DNA **1** (X, Z=C, Y=5fC). Treatment of the DNA **1** (20pmol) with 15% piperidine at 90 °C. The reacting time in lanes 1-6 was 0h, 0.5h, 1h, 1.5h, 2h, and 2.5h, respectively.

OCT4:HEX-AGCCCCAACCTCTT(5hmC)GCAGGAGGTCACCTGCTGAGCCTTGA  
STAT3:HEX-TAGGATGAATAGGAATTCTTTCCA(5hmC)GAAGTTGCGTTACAAAAAGT

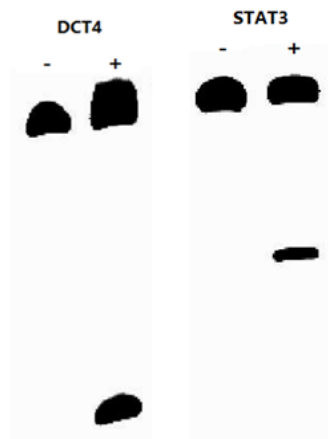

BCL2:HEX-AAGGATGGCGCACGCTGGGAGAACAGGGTA(5hmC)GATAACCGGGAGATAGTGA  
NANOG:HEX-GTGTGCATTGAGTTGAAGGACACAGAATT(5hmC)GGCAGTTGAACAGTGTGCAGTAAGT

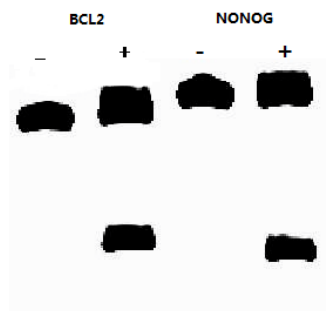

TNF $\beta$ :HEX-TGCCTGCCACGCTGCCACTGC(5hmC)GCTTCCTCTATAAAGGGACCTGAGCG  
HOX5A:HEX-CATGGCCGCGGCAGGAGGGGCCTTC(5hmC)GTCCCTGAGTATCTGAGCGTTTAA

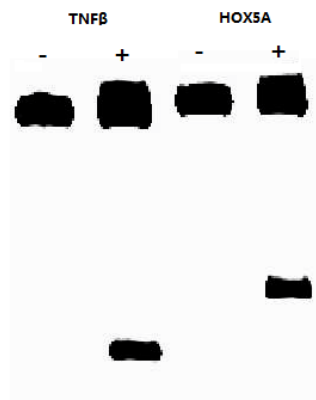

**Figure S3.** Polyacrylamide gel electrophoresis analysis of the DNA fragments containing 5hmC first oxidized by  $\text{K}_2\text{Cr}_2\text{O}_7$  and then treated with piperidine in the promoter regions of human STAT3, BCL2, OCT4, NANOG, HOX5A and TNF- $\beta$  genes. Lane ‘-’, the DNA fragments were treated without oxidation and reacted with piperidine directly; Lane ‘+’, the DNA fragments were treated with oxidation and then piperidine.
